# Supplementary material
Source: publisher figshare collection journal article supplement (https://acs.figshare.com/ndownloader/files/26181020)
Supplement: Supplementary file 1 [file 26181020]

# Supporting Information

*for*

## High-Performance Ketone Sensing in Vapor Phase Enabled by *o*-Carborane-Modified Cyclometalated Alkynyl-Gold(III) Complex-Based Fluorescent Films

Jing Zhang, Ke Liu, Zhongshan Liu, Zhaolong Wang, Chunxia Hua, Taihong Liu\*, and Yu Fang\*

Key Laboratory of Applied Surface and Colloid Chemistry of Ministry of Education, School of Chemistry and Chemical Engineering, Shaanxi Normal University, Xi'an 710062, P. R. China

\*Corresponding Authors. E-mails: yfang@snnu.edu.cn (Y. Fang); liuth121@snnu.edu.cn (T. Liu)

### Contents

|                                                                         |      |
|-------------------------------------------------------------------------|------|
| 1. Experimental Details .....                                           | S-2  |
| 2. Crystallographic Data .....                                          | S-4  |
| 3. Supplementary Figures and Tables .....                               | S-5  |
| 4. NMR and MS Spectra of the Intermediates and Target Fluorophore ..... | S-11 |
| References .....                                                        | S-17 |

# 1. Experimental Details

## 1.1 Synthesis and Characterization of the Related Six Intermediates

The synthetic route for **Au-CB** is shown in **Scheme S1**.

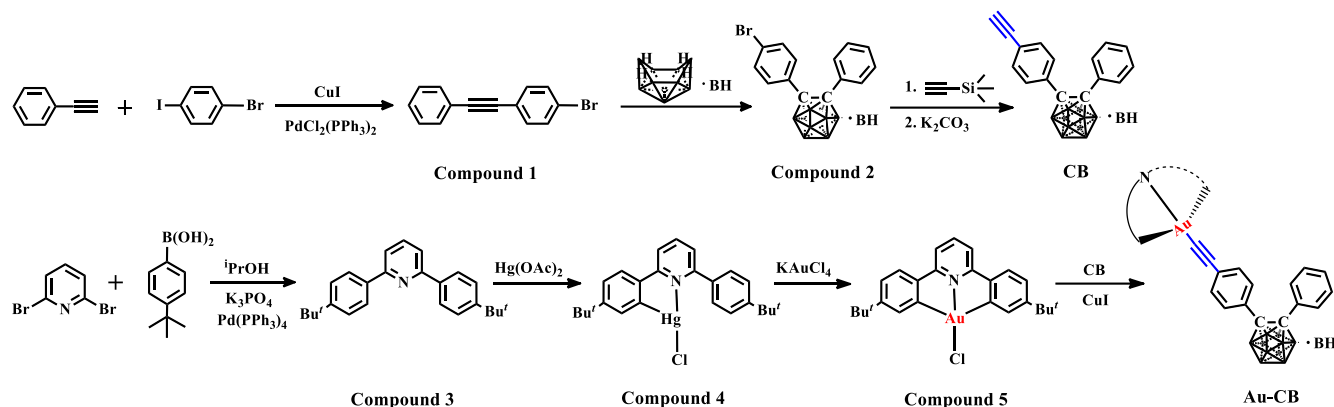

**Scheme S1.** Typical synthesis procedures for the target fluorophore, **Au-CB**

The intermediates **1**, **2** and **CB** are synthesized according to reference 1.<sup>[1]</sup> And the intermediates **3**, **4** and **5** are synthesized following reference 2.<sup>[2]</sup>

**Compound 1.** Yield: 58%. <sup>1</sup>H NMR (600 MHz,  $\text{CDCl}_3$ , ppm):  $\delta$  7.52 (m, 2H), 7.48 (m, 2H), 7.39 (m, 2H), 7.35 (m, 3H).

**Compound 2.** Yield: 54%. <sup>1</sup>H NMR (600 MHz, Acetone- $d_6$ , ppm):  $\delta$  7.53 (d,  $J$  = 12.0 Hz, 2H), 7.45 (t,  $J$  = 18.0 Hz, 4H), 7.37 (t,  $J$  = 18.0 Hz, 1H), 7.28 (t,  $J$  = 18.0 Hz, 2H).

**Compound CB.** Yield: 23%. <sup>1</sup>H NMR (600 MHz, Acetone- $d_6$ , ppm):  $\delta$  7.59 (dd,  $J$  = 8.2, 2.9 Hz, 4H), 7.34 (t,  $J$  = 7.9 Hz, 3H), 7.26 (t,  $J$  = 7.8 Hz, 2H), 3.79 (s, 1H).

**Compound 3.** Yield: 25%. <sup>1</sup>H NMR (600 MHz,  $\text{CD}_2\text{Cl}_2$ , ppm):  $\delta$  8.08 (d,  $J$  = 8.4 Hz, 4H), 7.84 (t,  $J$  = 7.8 Hz, 1H), 7.69 (d,  $J$  = 7.8 Hz, 2H), 7.54 (d,  $J$  = 8.4 Hz, 4H), 5.32 (s, 3H), 1.38 (s, 18H). HRMS (APCI-Orbitrap)  $m/z$ :  $[\text{M}+\text{H}]^+$  calc. for  $\text{C}_{25}\text{H}_{30}\text{N}$  344.2368, found 344.2373.

**Compound 4.** Yield: 62%. <sup>1</sup>H NMR (600 MHz,  $\text{CD}_2\text{Cl}_2$ , ppm):  $\delta$  7.93 (m, 3H), 7.88 (t,  $J$  = 7.8 Hz, 1H), 7.78 (d,  $J$  = 7.7 Hz, 1H), 7.74 (d,  $J$  = 7.7 Hz, 1H), 7.61 (d,  $J$  = 1.9 Hz, 1H), 7.55 (d,  $J$  = 8.5 Hz, 2H), 7.48 (dd,  $J$  = 8.2, 2.0 Hz, 1H), 1.38 (s,  $J$  = 5.2 Hz, 18H). HRMS (APCI-Orbitrap)  $m/z$ :  $[\text{M}+\text{H}]^+$  calc. for  $\text{C}_{25}\text{H}_{29}\text{HgClN}$  580.1672, found 580.1683.

**Compound 5.** Yield: 39%. <sup>1</sup>H NMR (600 MHz,  $\text{CD}_2\text{Cl}_2$ , ppm):  $\delta$  7.92 (d,  $J$  = 1.9 Hz, 2H), 7.86 (t,  $J$  = 8.0 Hz, 1H), 7.50 (d,  $J$  = 8.1 Hz, 2H), 7.43 (d,  $J$  = 8.0 Hz, 2H), 7.31 (dd,  $J$  = 8.1, 2.0 Hz, 2H), 1.37 (s, 18H). HRMS (APCI-Orbitrap)  $m/z$ :  $[\text{M}+\text{H}]^+$  calc. for  $\text{C}_{25}\text{H}_{28}\text{AuClN}$  574.1580, found 574.1570.

## 1.2 Synthesis of Au-CB

A mixture of [Au (BuC<sup>N</sup>C<sup>Bu</sup>) Cl] (0.20 g, 0.43 mmol) and CB (0.21 g, 0.65 mmol) in the presence of a catalytic amount of CuI (9.0 mg) in triethylamine (2.0 mL) and dichloromethane (35.0 mL) is stirred at room temperature for 3 h. After evaporation to dryness, the solid residue is purified by column chromatography on silica gel using dichloromethane (DCM) as the eluent. Subsequent recrystallization from layering of *n*-hexane onto the concentrated solution gives the product as pale-yellow crystal. Yield: 35%. <sup>1</sup>H NMR (600 MHz, CD<sub>2</sub>Cl<sub>2</sub>, ppm): δ 8.05 (d, *J* = 6.0 Hz, 2H), 7.83 (t, *J* = 12.1 Hz, 1H), 7.53 (dd, *J* = 12.1 Hz, 6.0 Hz, 4H), 7.44 (m, 4H), 7.35 (d, *J* = 6.0 Hz, 2H), 7.31 (m, 3H), 7.22 (t, *J* = 18.2 Hz, 2H), 1.38 (s, 18H); <sup>11</sup>B NMR (192 MHz, CD<sub>2</sub>Cl<sub>2</sub>, ppm): δ -2.09, -2.99, -10.98, -10.16; <sup>13</sup>C NMR (150 MHz, CD<sub>2</sub>Cl<sub>2</sub>, ppm): δ 166.78, 164.80, 155.24, 146.53, 142.36, 130.69, 130.34, 128.34, 124.99, 123.92, 116.28, 99.81, 96.56, 85.53, 53.76, 53.58, 53.59, 53.21, 53.03, 35.22, 30.93, 29.68; HRMS (APCI-Orbitrap) *m/z*: [M+H]<sup>+</sup> calc. for C<sub>41</sub>H<sub>47</sub>AuB<sub>10</sub>N 860.4339, found 860.4366.

## 1.3 Synthesis of Au-C<sub>6</sub>H<sub>5</sub>

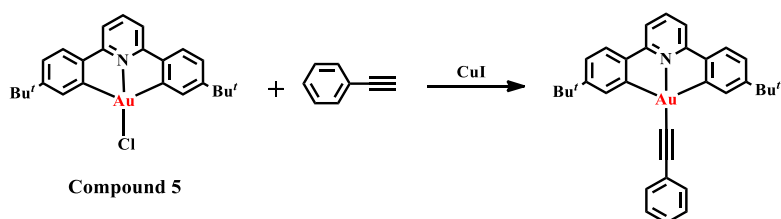

**Scheme S2.** Typical synthesis procedures for the control fluorophore, Au-C<sub>6</sub>H<sub>5</sub>.

The compound Au-C<sub>6</sub>H<sub>5</sub> was synthesized according to the modification of a reported procedure.<sup>[2]</sup> Yield: 56%. <sup>1</sup>H NMR (600 MHz, CD<sub>2</sub>Cl<sub>2</sub>, ppm): δ 8.18 (d, *J* = 2.0 Hz, 2H), 7.86 (t, *J* = 8.0 Hz, 1 H), 7.59 (dd, *J* = 8.2 Hz, 2.0 Hz, 2H), 7.56 (d, *J* = 8.2 Hz, 2 H), 7.46 (d, *J* = 8.0 Hz, 2 H), 7.35 (m, 5H), 1.39 (s, 18 H).

## 2. Crystallographic Data

**Table S1.** Crystallographic data of **Au-CB**.

|                                         |                                                                                                                                                           |
|-----------------------------------------|-----------------------------------------------------------------------------------------------------------------------------------------------------------|
| CCDC Deposit Number                     | 2045292                                                                                                                                                   |
| Empirical formula                       | C <sub>41</sub> H <sub>47</sub> AuB <sub>10</sub> N                                                                                                       |
| Formula weight                          | 860.4339                                                                                                                                                  |
| Temperature/K                           | 193 K                                                                                                                                                     |
| Wavelength                              | 1.34139                                                                                                                                                   |
| Crystal system                          | Triclinic                                                                                                                                                 |
| Space group                             | P-1                                                                                                                                                       |
| Unit cell dimensions                    | a = 13.2242 (4) Å<br>b = 13.2802 (4) Å<br>c = 15.3500 (5) Å<br>$\alpha = 106.647 (1)^\circ$<br>$\beta = 111.995 (1)^\circ$<br>$\gamma = 95.364 (1)^\circ$ |
| Volume/Å <sup>3</sup>                   | 2332.83 (13)                                                                                                                                              |
| Z                                       | 2                                                                                                                                                         |
| $\rho_{\text{calc}}$ g/cm <sup>3</sup>  | 1.463                                                                                                                                                     |
| $\mu$ /mm <sup>-1</sup>                 | 5.620                                                                                                                                                     |
| F (000)                                 | 1024.0                                                                                                                                                    |
| Crystal size/mm <sup>3</sup>            | 0.100 × 0.100 × 0.100 mm <sup>3</sup>                                                                                                                     |
| Radiation                               | Ca K $\alpha$ ( $\lambda = 1.54178$ )                                                                                                                     |
| $\theta$ range for data collection/°    | 2.881 to 56.975 °                                                                                                                                         |
| Index ranges                            | -16 ≤ h ≤ 16, -16 ≤ k ≤ 16, -19 ≤ l ≤ 19                                                                                                                  |
| Reflections collected                   | 32994                                                                                                                                                     |
| Independent reflections                 | 9494 [R(int) = 0.0647]                                                                                                                                    |
| Data/restraints/parameters              | 9494 / 0 / 539                                                                                                                                            |
| Completeness to theta                   | 56.975                                                                                                                                                    |
| Max. and min. transmission              | 0.599 and 0.570                                                                                                                                           |
| Refinement method                       | Full-matrix least-squares on F <sup>2</sup>                                                                                                               |
| Goodness-of-fit on F <sup>2</sup>       | 1.026                                                                                                                                                     |
| Final R indexes [ $I \geq 2\sigma(I)$ ] | R <sub>1</sub> = 0.0434, wR <sub>2</sub> = 0.1118                                                                                                         |
| Final R indexes [all data]              | R <sub>1</sub> = 0.0478, wR <sub>2</sub> = 0.1118                                                                                                         |
| Extinction coefficient                  | 0.00491(19)                                                                                                                                               |
| Largest diff. peak/hole                 | 1.417 d -1.858 e. Å <sup>-3</sup>                                                                                                                         |

### 3. Supplementary Figures and Tables

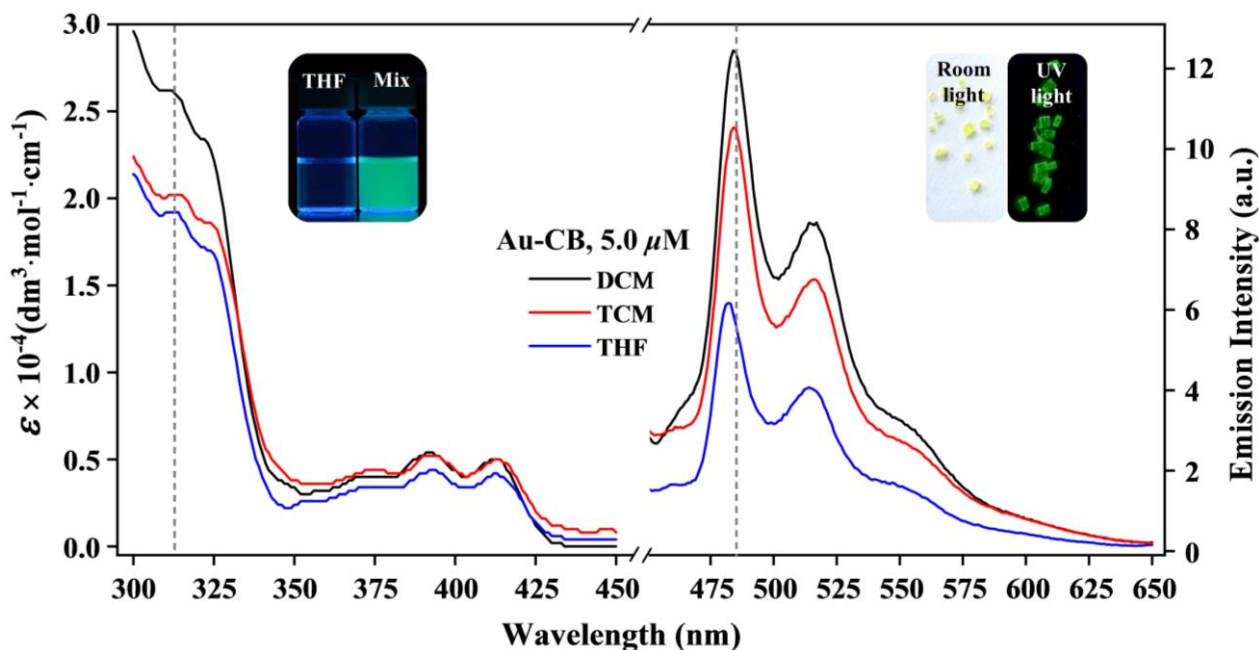

**Figure S1.** UV-vis absorption and fluorescence emission spectra ( $\lambda_{\text{ex}} = 330 \text{ nm}$ ) of **Au-CB** recorded in  $\text{CH}_2\text{Cl}_2$  (DCM),  $\text{CHCl}_3$  (TCM), and tetrahydrofuran (THF) at a concentration of  $5.0 \times 10^{-6} \text{ mol/L}$ . Inset: Fluorescent images of compound **Au-CB** in solution under UV light (365 nm, left: THF; right: THF/ $\text{H}_2\text{O}$  mixture) and solid state under daylight and UV light (365 nm).

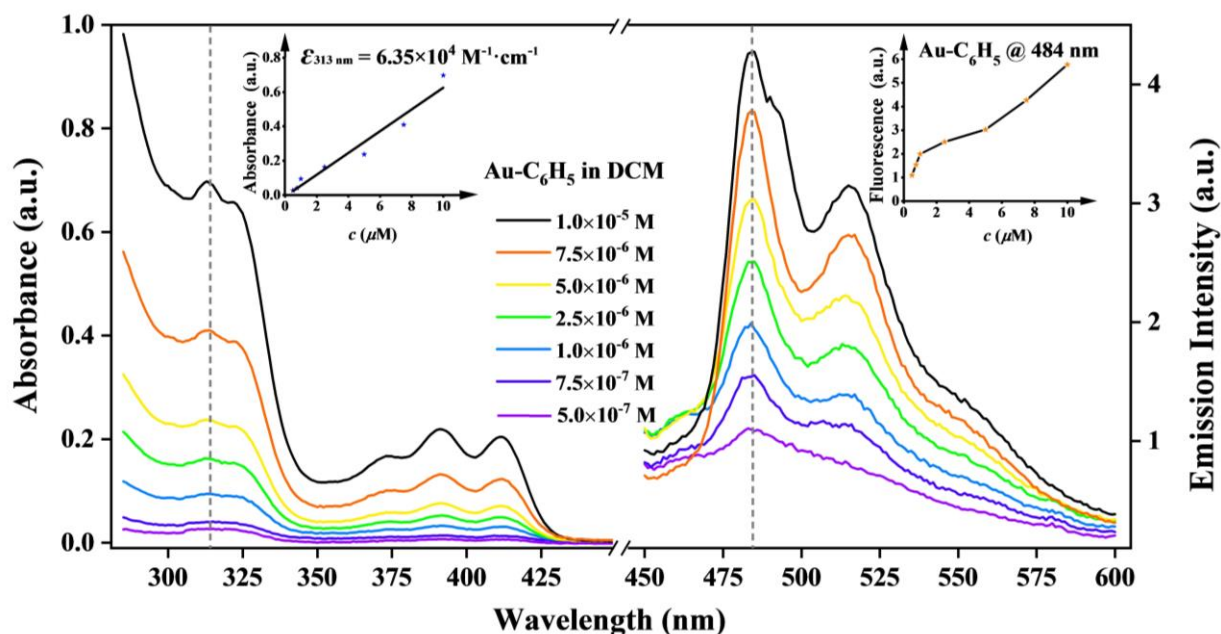

**Figure S2.** UV-vis absorption (left) and fluorescence emission spectra (right,  $\lambda_{\text{ex}} = 330 \text{ nm}$ ) of **Au-C<sub>6</sub>H<sub>5</sub>** in DCM at different concentrations. Inset: 1) Lambert-Beer plot for the absorption of **Au-C<sub>6</sub>H<sub>5</sub>** in DCM; 2) Plot of fluorescence intensity at 484 nm against the concentration of the control fluorophore **Au-C<sub>6</sub>H<sub>5</sub>**.

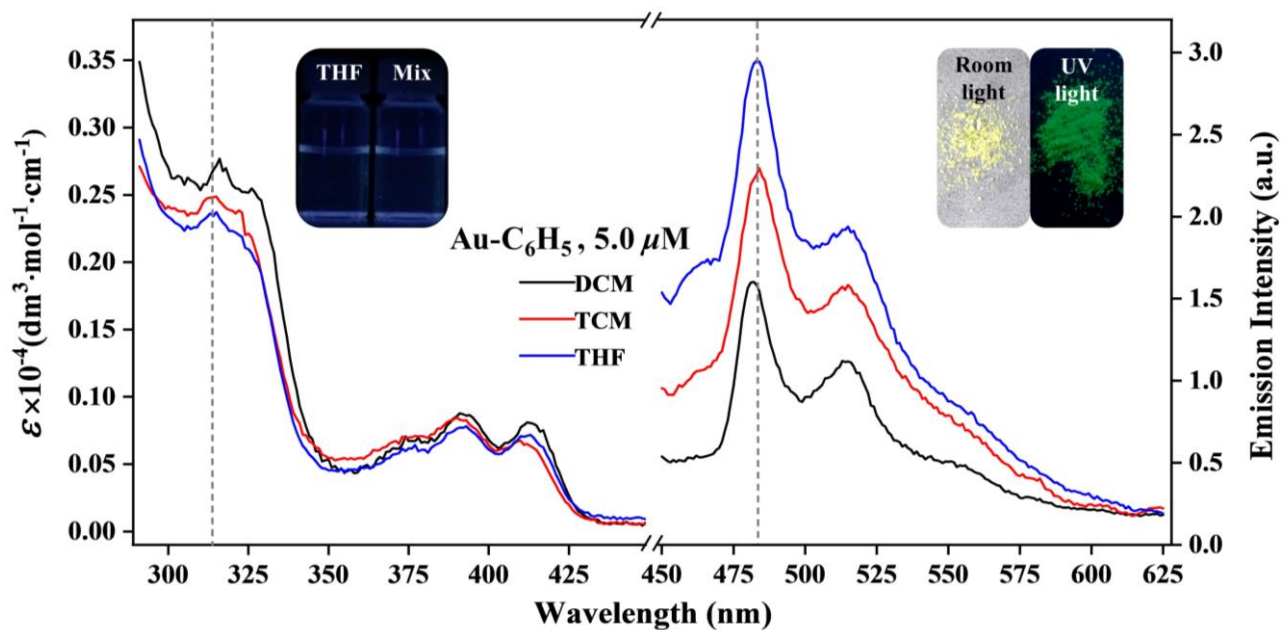

**Figure S3.** UV-vis absorption and fluorescence emission spectra ( $\lambda_{\text{ex}} = 330 \text{ nm}$ ) of **Au-C<sub>6</sub>H<sub>5</sub>** recorded in DCM, TCM, and THF at a concentration of  $5.0 \times 10^{-6} \text{ mol/L}$ . Inset: Fluorescent images of compound in solution under UV light (365 nm, left: THF; right: THF/H<sub>2</sub>O mixtures) and solid state under daylight and UV light (365 nm).

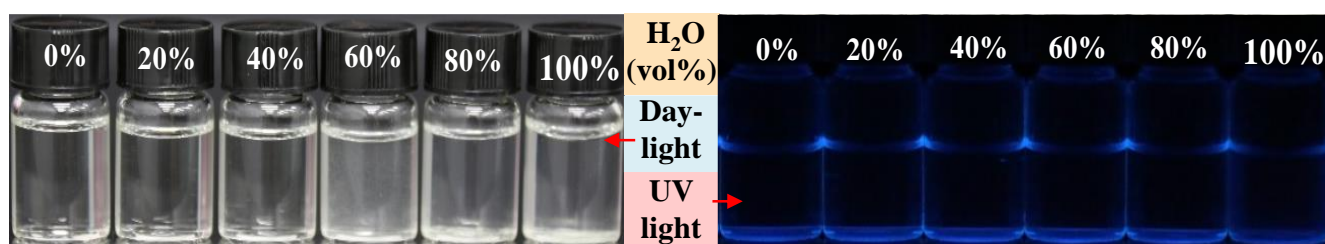

**Figure S4.** Fluorescence images of **Au-C<sub>6</sub>H<sub>5</sub>** in the mixtures of THF/H<sub>2</sub>O with different compositions. All the sample concentrations are  $5.0 \mu\text{M}$ .

**Table S2.** Fluorescence lifetime data for **Au-CB** and **Au-C<sub>6</sub>H<sub>5</sub>**.

|                                      | $\lambda$ (nm) | $\tau_1$ (ns)    | $\tau_2$ (ns)      | $\chi^2$ |
|--------------------------------------|----------------|------------------|--------------------|----------|
| <b>Au-CB</b>                         | 302 nm         | 7.35<br>(6.16%)  | 105.42<br>(93.84%) | 1.14     |
|                                      | 343 nm         | 6.61<br>(11.75%) | 99.50<br>(88.25%)  | 1.109    |
|                                      | 405 nm         | 6.57<br>(3.88%)  | 113.20<br>(96.12%) | 1.037    |
| <b>Au-C<sub>6</sub>H<sub>5</sub></b> | 302 nm         | 5.56<br>(15.78%) | 94.69<br>(94.22%)  | 1.032    |
|                                      | 343 nm         | 5.22<br>(8.67%)  | 95.62<br>(91.33%)  | 1.043    |
|                                      | 405 nm         | 7.42<br>(3.55%)  | 98.15<br>(96.45%)  | 1.055    |

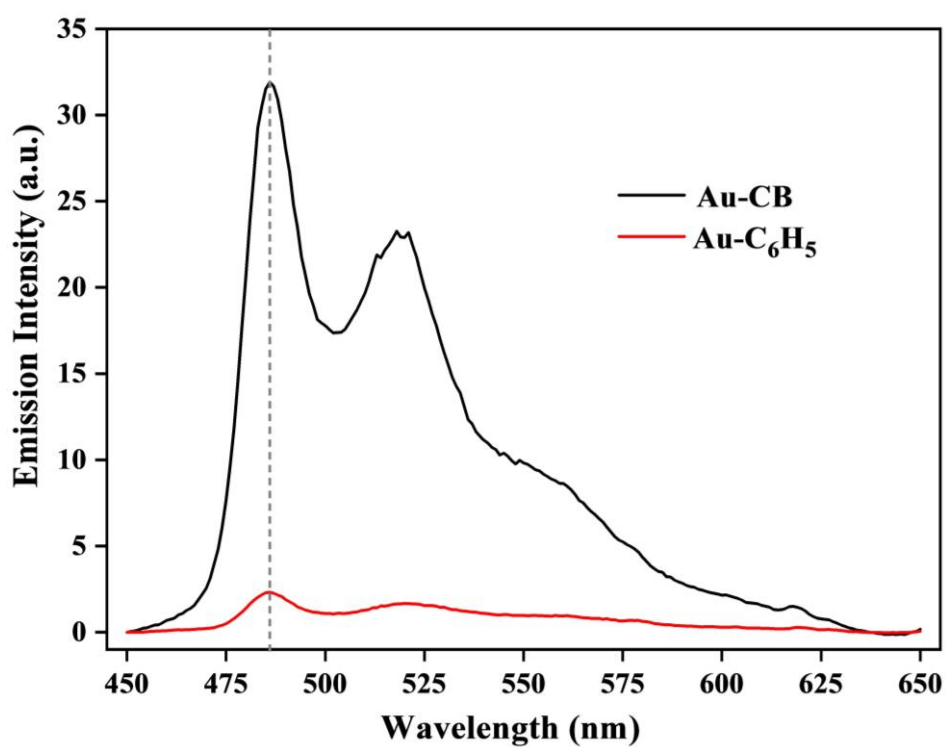

**Figure S5.** Fluorescence emission spectra ( $\lambda_{\text{ex}} = 330$  nm) of the fluorescent films based on **Au-CB** (black line) and **Au-C<sub>6</sub>H<sub>5</sub>** (red line).

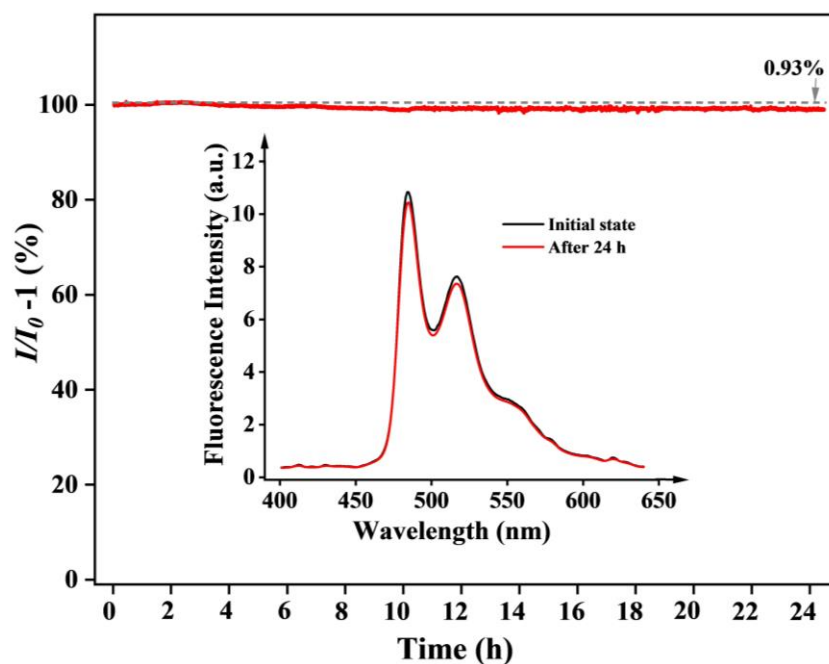

**Figure S6.** Photochemical stability of the Au-CB-based fluorescent film monitored using the homemade sensing platform ( $\lambda_{\text{ex}} = 330$  nm). Inset: Fluorescence emission spectra of the film monitored before and after the continuous measurement (24 h).

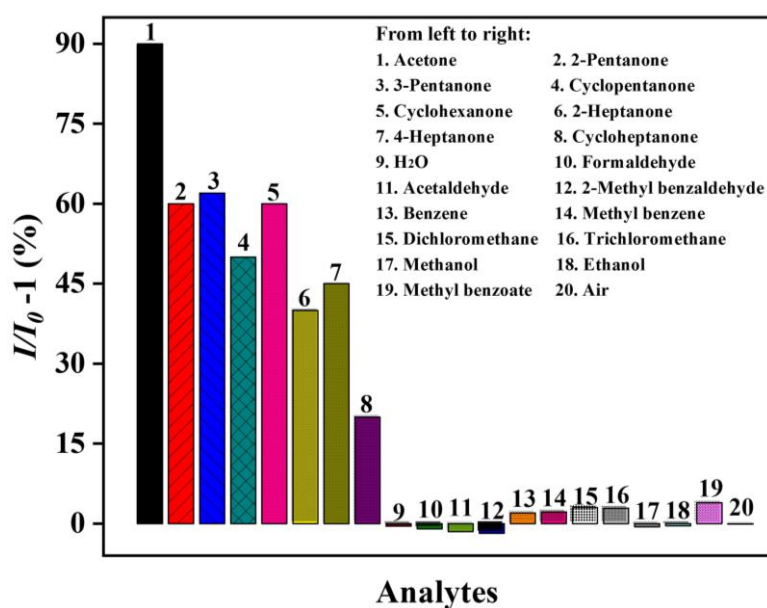

**Figure S7.** Response patterns of the tested analytes and the potential interferences obtained by collecting fluorescence intensity variations of the film device. Notes: the Arabic numbers in the figure stand for different chemicals. Specifically, **1.** Acetone; **2.** 2-Pentanone; **3.** 3-Pentanone; **4.** Cyclopentanone; **5.** Cyclohexanone; **6.** 2-Heptanone; **7.** 4-Heptanone; **8.** Cycloheptanone; **9.** H<sub>2</sub>O; **10.** Formaldehyde; **11.** Acetaldehyde; **12.** 2-Methyl benzaldehyde; **13.** Benzene; **14.** Methylbenzene; **15.** Dichloromethane; **16.** Trichloromethane; **17.** Methanol; **18.** Ethanol; **19.** Methyl benzoate; **20.** Air.



**Table S3.** Important physical parameters of some tested ketones.

|                | Chemical structure                                                                  | Boiling point (°C) | Vapor pressure (mmHg, 25 °C) |
|----------------|-------------------------------------------------------------------------------------|--------------------|------------------------------|
| Acetone        |    | 56.1               | 230.7                        |
| 2-Pentanone    |    | 102.2              | 36.5                         |
| 3-Pentanone    |    | 102.0              | 37.5                         |
| Cyclopentanone |    | 130.7              | 12.4                         |
| Cyclohexanone  |    | 155.6              | 2.9                          |
| 2-Heptanone    |    | 151.1              | 3.2                          |
| 4-Heptanone    |  | 144.0              | 5.2                          |
| Cycloheptanone |  | 185.2              | 0.9                          |

**Table S4.** Response time (RPT) and recovery time (RCT) measurements for acetone and cyclohexanone among the examined ketone vapors.

| Trial   | Acetone |       | Cyclohexanone |        |
|---------|---------|-------|---------------|--------|
|         | RPT/s   | RCT/s | RPT/s         | RCT/s  |
| 1       | 4.41    | 47.88 | 6.12          | 448.38 |
| 2       | 4.14    | 51.84 | 6.84          | 422.64 |
| 3       | 4.41    | 49.77 | 7.11          | 428.85 |
| 4       | 3.51    | 53.28 | 6.39          | 408.42 |
| 5       | 4.50    | 45.63 | 6.30          | 422.19 |
| 6       | 4.32    | 52.47 | 7.11          | 424.35 |
| 7       | 4.59    | 55.35 | 6.75          | 411.93 |
| 8       | 4.41    | 54.36 | 6.75          | 412.92 |
| 9       | 4.59    | 53.28 | 7.02          | 406.08 |
| 10      | 4.86    | 62.72 | 6.48          | 421.20 |
| 11      | 4.68    | 50.05 | 6.93          | 424.89 |
| 12      | 4.77    | 56.79 | 7.11          | 429.03 |
| 13      | 4.50    | 51.12 | 6.66          | 401.94 |
| 14      | 4.41    | 58.05 | 6.84          | 410.40 |
| 15      | 4.59    | 53.19 | 6.66          | 404.91 |
| Average | 4.41    | 53.01 | 6.75          | 419.13 |

Notes: RPT is the abbreviation of response time and RCT is the recovery time, all the time units used are seconds.

## 4. NMR and MS Spectra of the Intermediates and Target Fluorophore

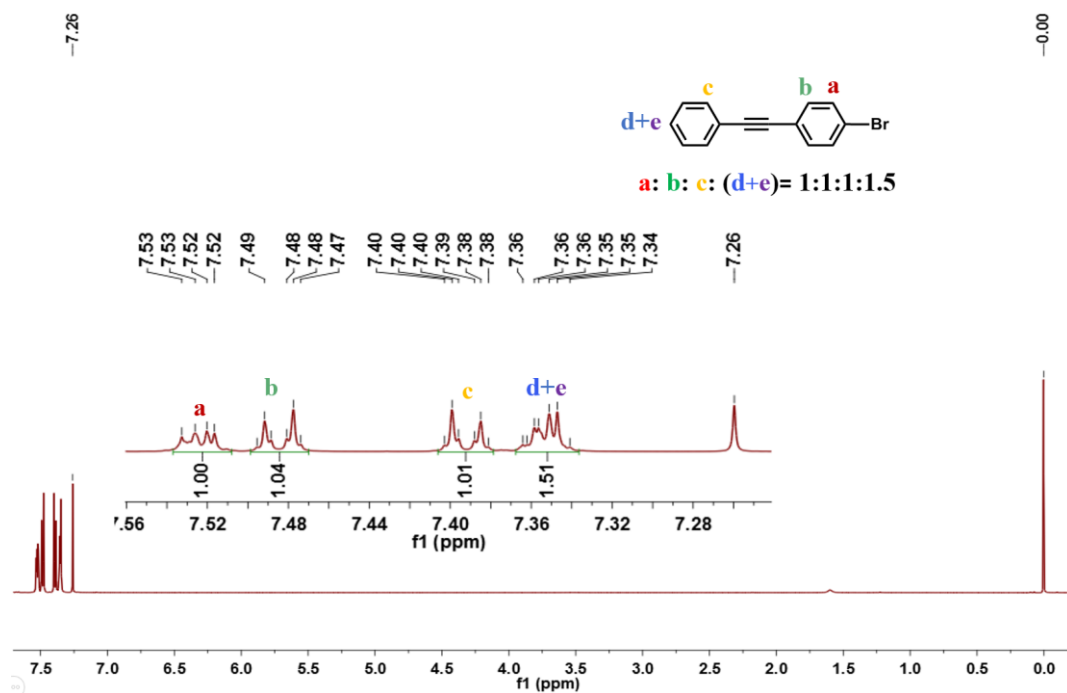

**Figure S8.**  $^1\text{H}$  NMR spectrum of compound **1** (600 MHz,  $\text{CDCl}_3$ ).

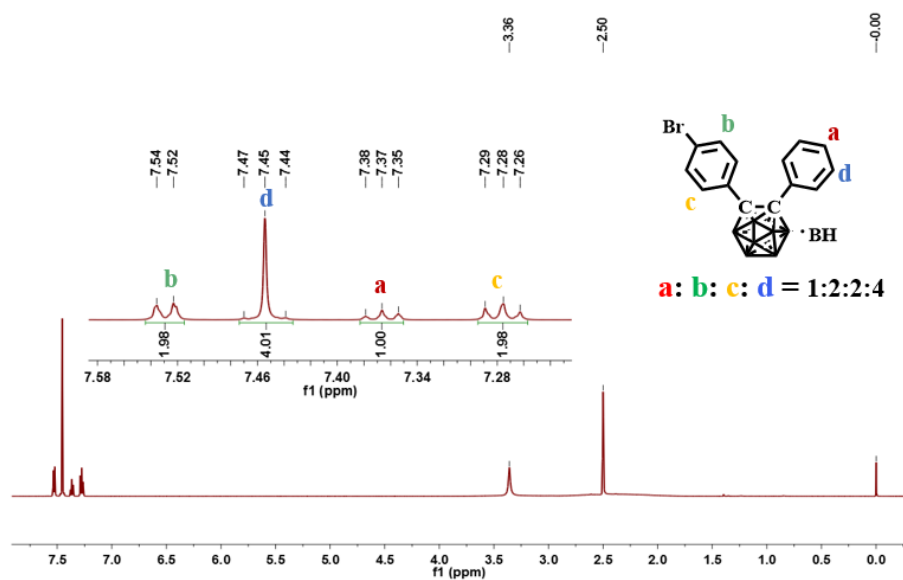

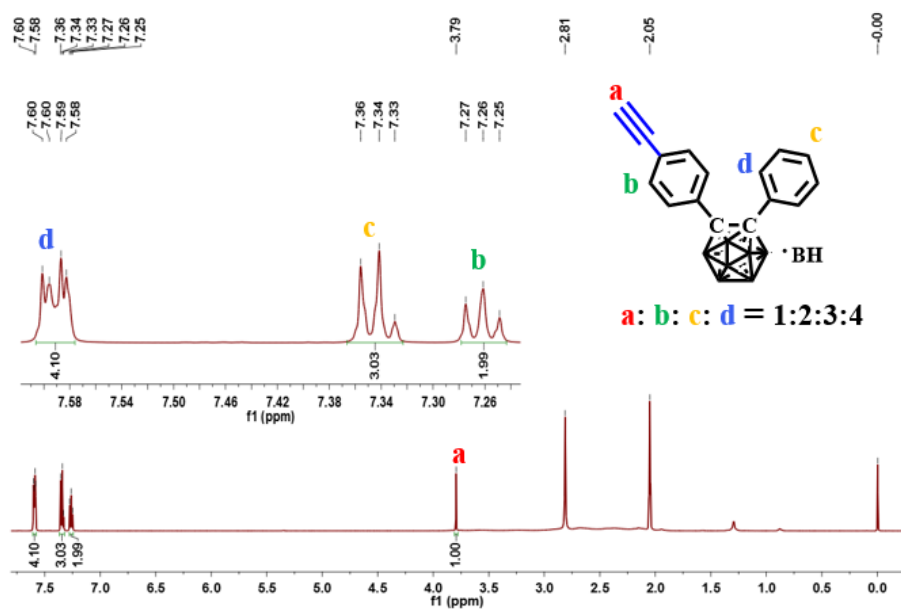

**Figure S10.**  $^1\text{H}$  NMR spectrum of compound **CB** (600 MHz, Acetone- $d_6$ ).

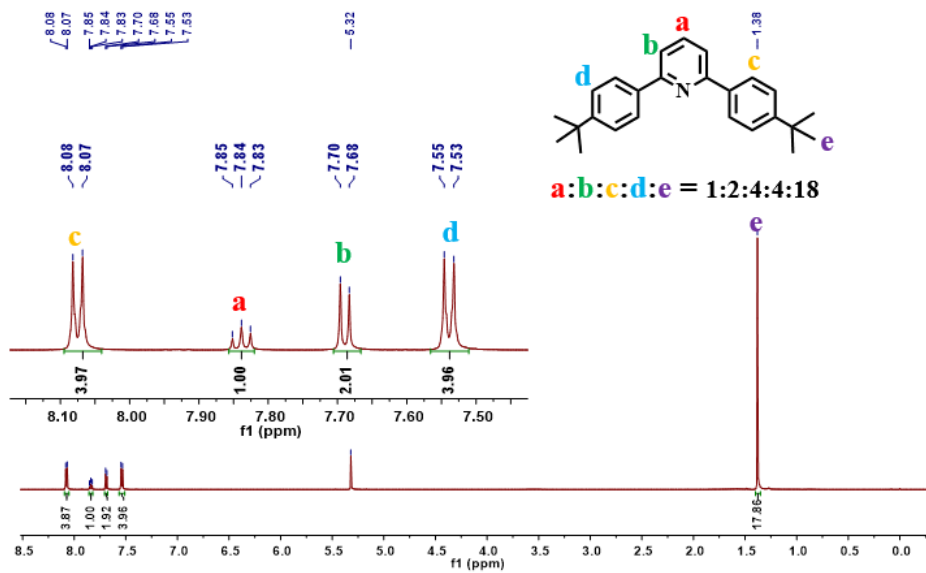

**Figure S11.**  $^1\text{H}$  NMR spectrum of compound **3** (600 MHz,  $\text{CD}_2\text{Cl}_2$ ).

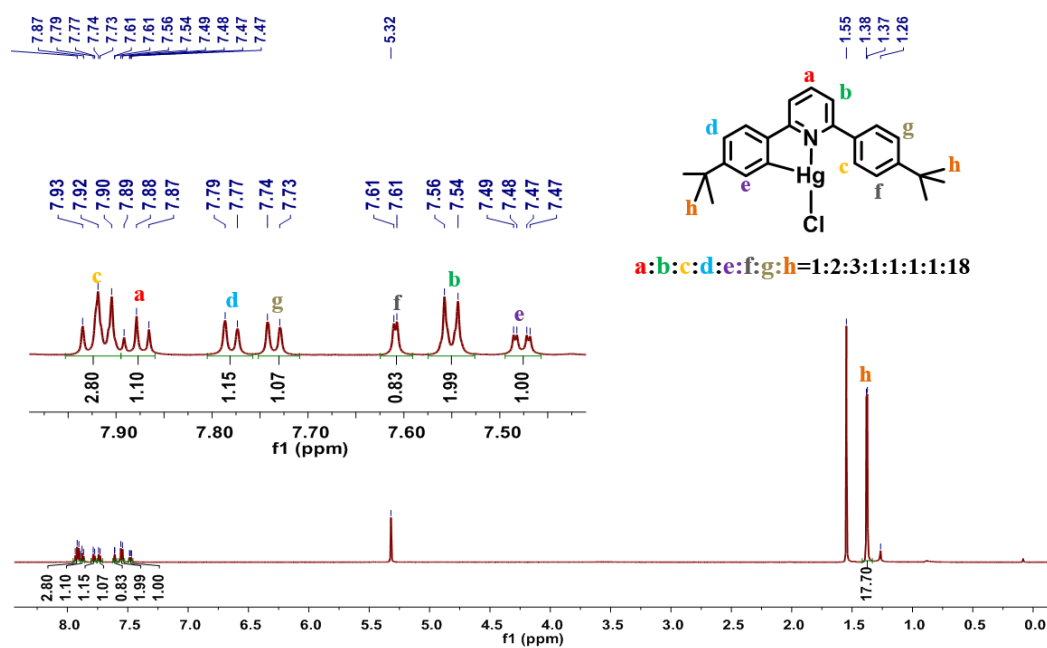

**Figure S12.**  $^1\text{H}$  NMR spectrum of compound **4** (600 MHz,  $\text{CD}_2\text{Cl}_2$ ).

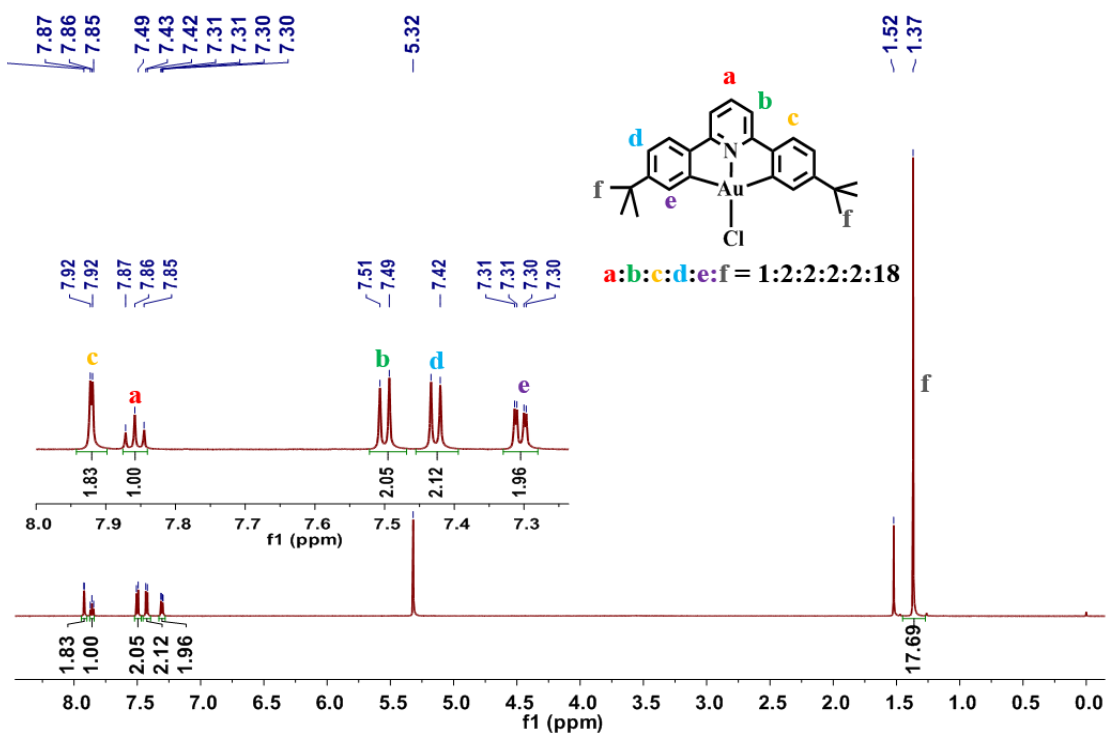

**Figure S13.**  $^1\text{H}$  NMR spectrum of compound **5** (600 MHz,  $\text{CD}_2\text{Cl}_2$ ).

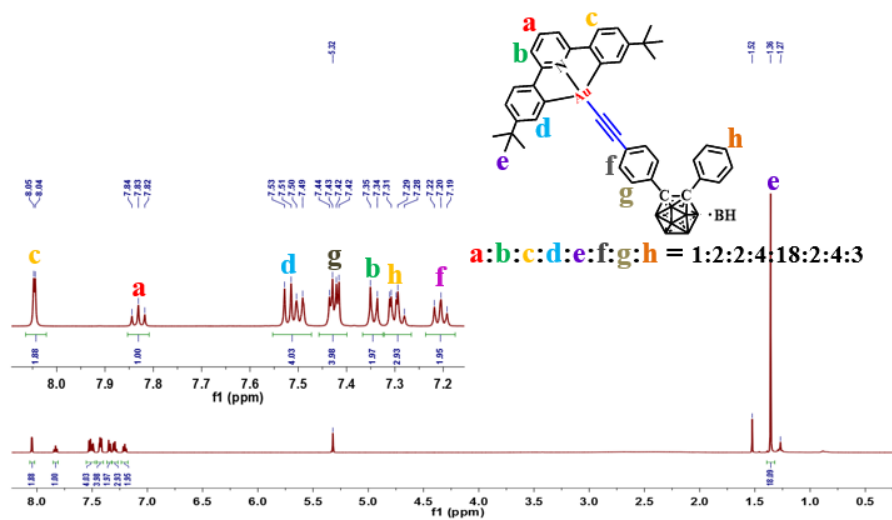

**Figure S14.**  $^1\text{H}$  NMR spectrum of compound **Au-CB** (600 MHz,  $\text{CD}_2\text{Cl}_2$ ).

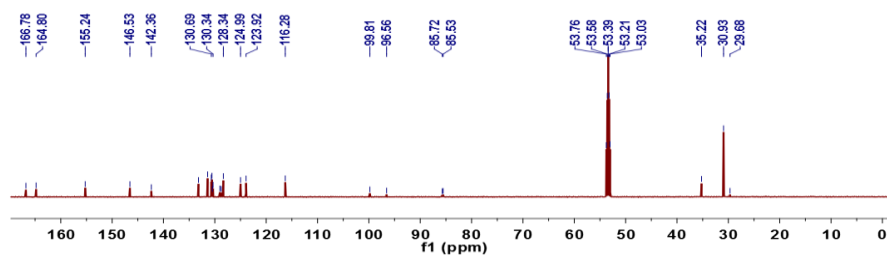

**Figure S15.**  $^{13}\text{C}$  NMR spectrum of compound **Au-CB** (150 MHz,  $\text{CD}_2\text{Cl}_2$ ).

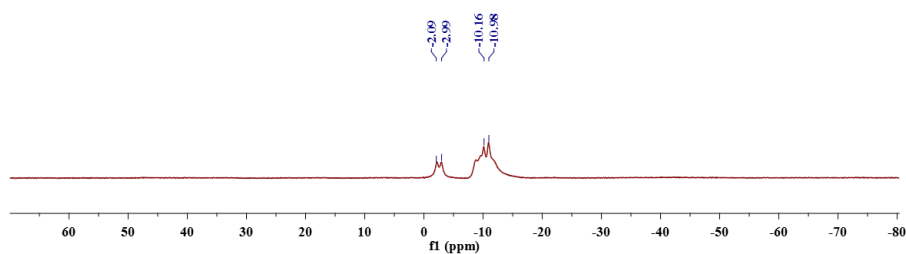

**Figure S16.**  $^{11}\text{B}$  NMR spectrum of compound **Au-CB** (192 MHz,  $\text{CD}_2\text{Cl}_2$ ).

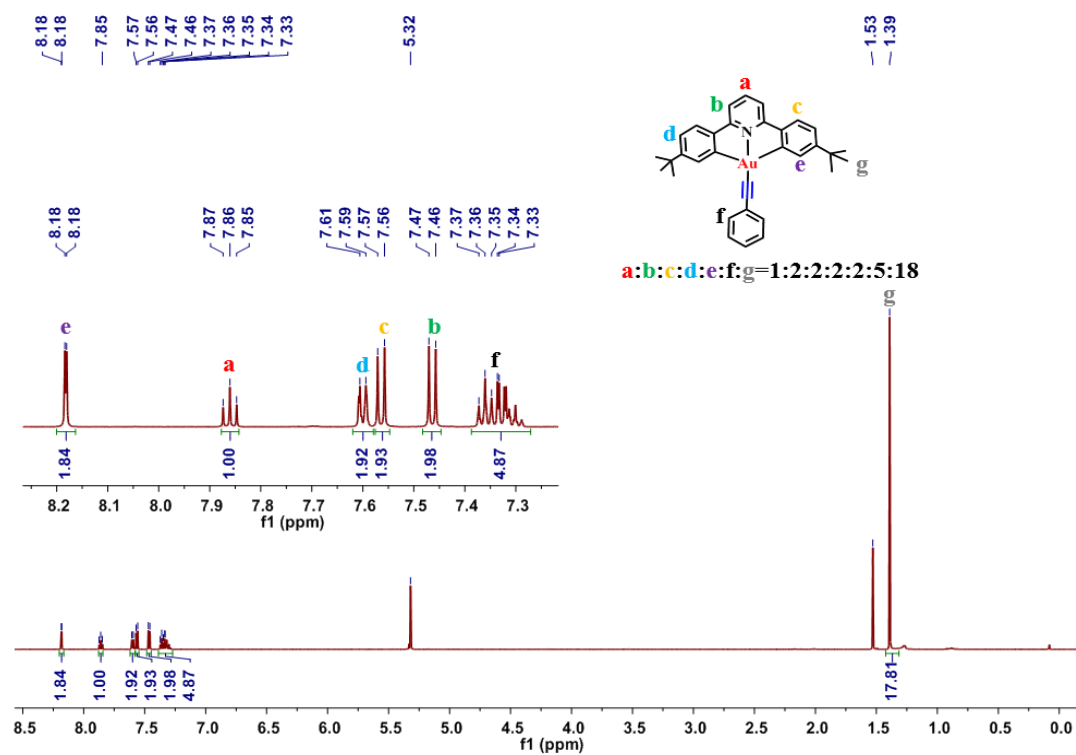

**Figure S17.**  $^1\text{H}$  NMR spectrum of compound **Au-C<sub>6</sub>H<sub>5</sub>** (600 MHz,  $\text{CD}_2\text{Cl}_2$ ).

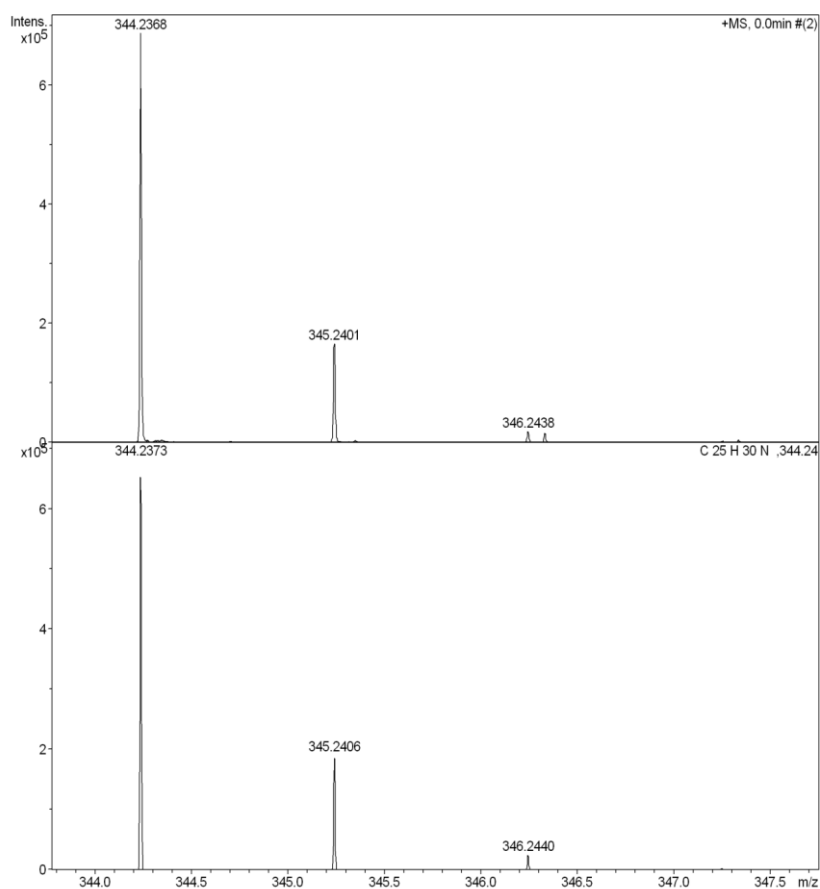

**Figure S18.** HRMS spectrum of compound **3**.

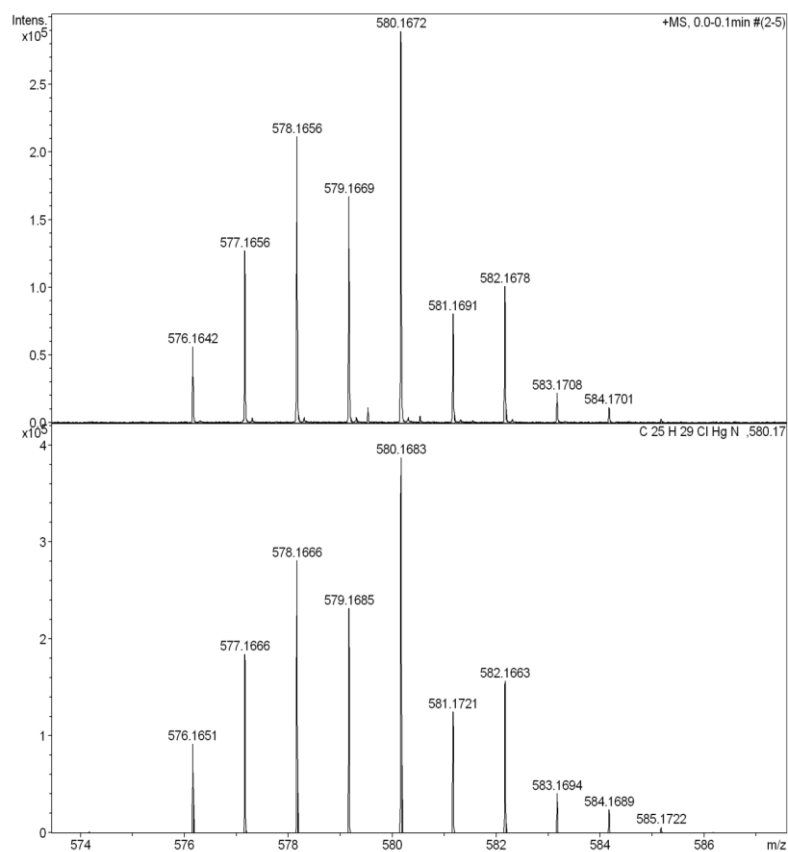

**Figure S19.** HRMS spectrum of compound **4**.

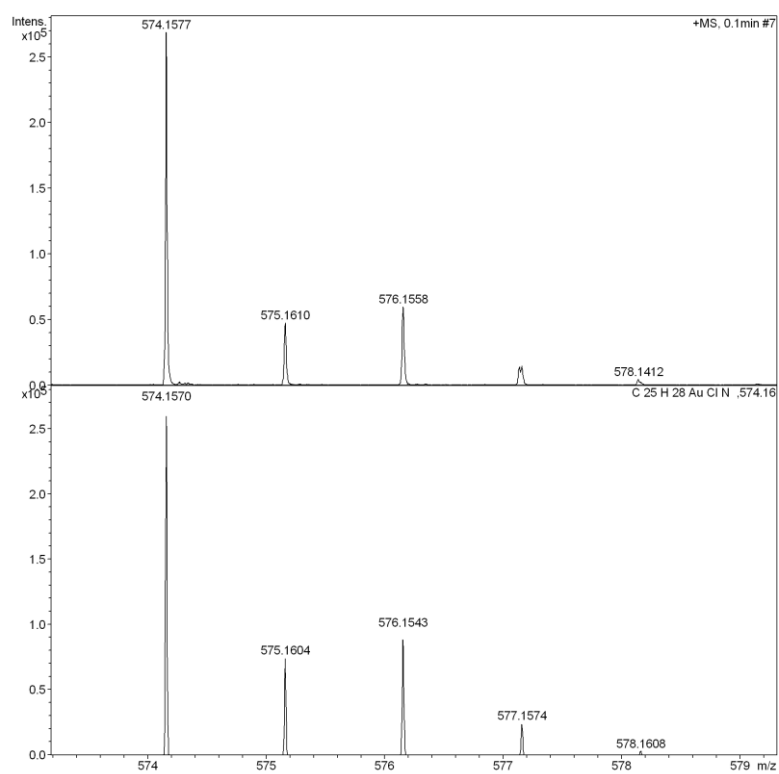

**Figure S20.** HRMS spectrum of compound **5**.



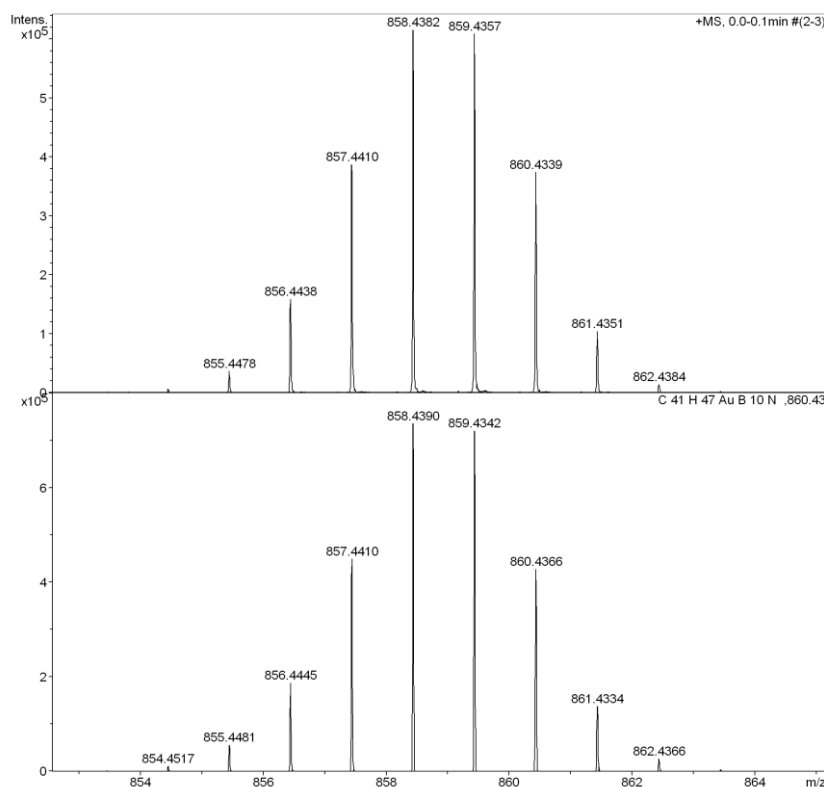

**Figure S21.** HRMS spectrum of compound **Au-CB**.

## References

- [1] Kokado, K.; Chujo, Y. Emission *via* Aggregation of Alternating Polymers with *o*-Carborane and *p*-Phenylene-Ethynylene Sequences. *Macromolecules* **2009**, *42*, 1418-1420.
- [2] Wong, K. M.; Hung, L.; Lam, W. H.; Zhu, N.; Yam, V. W. W. A Class of Luminescent Cyclometalated Alkynylgold(III) Complexes: Synthesis, Characterization, and Electrochemical, Photophysical, and Computational Studies of  $[\text{Au}(\text{C}^{\wedge}\text{N}^{\wedge}\text{C})(\text{C}\equiv\text{C}-\text{R})](\text{C}^{\wedge}\text{N}^{\wedge}\text{C})\kappa^3\text{C},\text{N},\text{C}$  Bis-Cyclometalated 2,6-Diphenyl-Pyridyl). *J. Am. Chem. Soc.* **2007**, *129*, 4350-4365.
